# Supplementary material for: Loading and pre-loading processes generate a distinct siRNA population in Tetrahymena
Source: PubMed Central journal article supplement — Biochem Biophys Res Commun. 2013 Jul 5;436(3):497–502. doi: 10.1016/j.bbrc.2013.05.133 (PMC3714595; doi:10.1016/j.bbrc.2013.05.133), 2013-07-05
Supplement: mmc2.pdf [file mmc2.pdf]

| sample                | Sequencer | Total useful reads* | rRNAs sense | rRNAs anti-sense | tRNAs sense | tRNAs anti-sense | snRNAs sense | snRNAs anti-sense | Mitochondrial genome | Used for analysis | Data used for Fig. |
|-----------------------|-----------|---------------------|-------------|------------------|-------------|------------------|--------------|-------------------|----------------------|-------------------|--------------------|
| Twilp-IP              | GAI       | 34959335            | 1133041     | 5622             | 771751      | 1473             | 13178        | 159               | 69643                | 32964468          | 1                  |
| TWI1_KO_3h            | GAI       | 24967491            | 915849      | 1947             | 749782      | 836              | 4306         | 145               | 151125               | 23143501          | 2,3                |
| HA-Twilp IP           | HiSeq2000 | 41322677            | 32721       | 2400             | 27154       | 1324             | 475          | 198               | 1359                 | 41260968          | 2F                 |
| HA-Twilp-hAGO2Lmut IP | HiSeq2000 | 39352231            | 215056      | 2819             | 27318       | 1083             | 483          | 163               | 2022                 | 39107352          | 2F                 |

\*longer than 18 nt, did not match to the mixed phiX174 phage DNA, and no non-ACGT bases in the first 25 nt

**Table S1. Basic analysis of sequence reads from small RNA cDNA libraries**

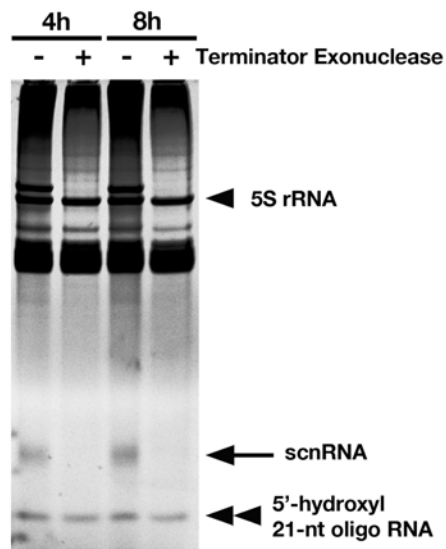

Supplementary Figure S1. Treatment of total RNA with the terminator 5'-monophosphate specific exonuclease.

Total RNA from the wild-type cells at 4 h or 8 h post-mixing was combined with a 21-nt oligoribonucleotide possessing a 5'-hydroxyl and was incubated with (+) or without (-) Terminator Exonuclease. Positions of the scnRNA, the 5S rRNA (possessing a 5'-triphosphate), and the 21-nt oligoribonucleotide are marked with an arrow, a single arrowhead, and double arrowheads, respectively.

**Figure S1**

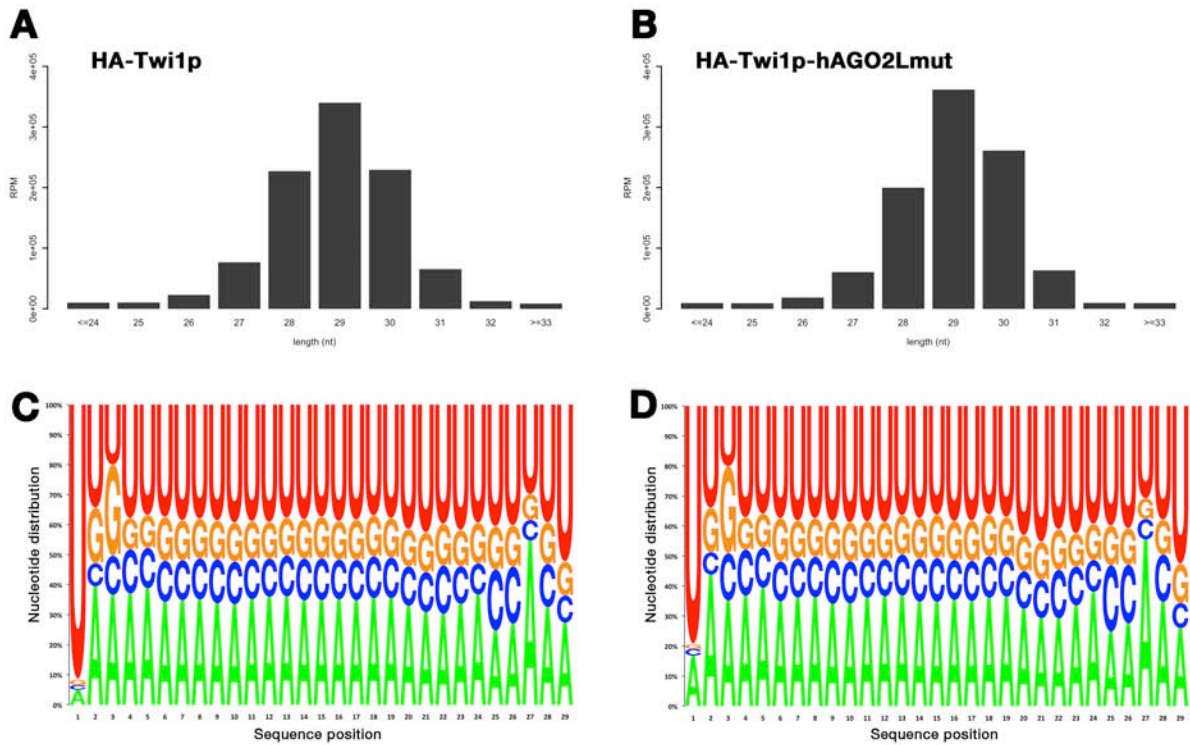

Supplementary Figure S2. Comparison of HA-Twi1p-associated and HA-Twi1p-hAGO2Lmut-associated small RNAs

(A, B) Size distribution of the HA-Twi1p-associated (A) and Twi1p-hAGO2Lmut-associated (B) small RNAs. The number of sequenced small RNAs (reads per million sequences (RPM)) of each size is shown.  
 (C, D) Base composition of the HA-Twi1p-associated (C) and Twi1p-hAGO2Lmut-associated (D) 29-nt RNAs.

Figure S2
